# Supplementary material for: Comprehensive ctDNA Measurements Improve Prediction of Clinical Outcomes and Enable Dynamic Tracking of Disease Progression in Advanced Pancreatic Cancer
Source: Oxford University Press journal article supplement (doi:10.1158/1078-0432.ccr-22-3526), 2023-01-20
Supplement: ccr-22-3526_supplemental_table_1_suppts1.xlsx [file ccr-22-3526_supplemental_table_1_suppts1.xlsx]

## Sheet: Ark1
Supplemental table 1: CHIP variants in cfDNA
Sample ID	Age	Gene	Mutation effect	Mutation Type
P2	53	ARID1A	Y815Y	SNV
P12	54	TP53	D42*	INDEL
P14	67	TP53	G244D	SNV
		TP53	S241F	SNV
P15	72	TP53	Y163C	SNV
P27	60	ARID1A	V2228M	SNV
P32	66	TP53	P177H	SNV
P37	81	TP53	C238S	SNV
P41	66	TP53	F270S	SNV
P49	79	TP53	UTR5	SNV
P63	63	RNF43	R159W	SNV
P92	79	TP53	R248W	SNV
