# Supplementary material for: Comprehensive ctDNA Measurements Improve Prediction of Clinical Outcomes and Enable Dynamic Tracking of Disease Progression in Advanced Pancreatic Cancer
Source: Oxford University Press journal article supplement (doi:10.1158/1078-0432.ccr-22-3526), 2023-01-20
Supplement: ccr-22-3526_supplemental_table_2_suppts2.xlsx [file ccr-22-3526_supplemental_table_2_suppts2.xlsx]

## Sheet: B1-samples
Supplemental table 2: ctDNA point mutation variants in baseline samples
Sample ID	Age	Sex	Stage	Tumor location	Gene	Mutation effect	Mutation type	ctDNA (%)	Copies/mL plasma
P2	53	F	IV	Body	CDKN2A	R80*	SNV	61.7117	16301.1
					TP53	R175H	SNV	60.0827	15870.8
					KRAS	G12D	SNV	41.9774	11088.3
					RNF43	W13Lfs*27	INDEL	25.74	6799
P3	55	M	IV	Tail	TP53	M237I	SNV	34.2576	33298.4
					KRAS	Q61H	SNV	26.5975	25852.7
					CDKN2A	L117del	INDEL	17.2425	16759.7
					CDKN2A	Splice Site	SNV	13.0241	12659.4
P4	74	F	IV	Head	KRAS	G12D	SNV	22.3975	898.368
					TP53	G245S	SNV	17.142	687.569
P5	67	M	IV	Not applicable	KRAS	G12V	SNV	0.502723	13.9782
					TP53	H179R	SNV	0.493326	13.7224
P6	53	M	IV	Tail	KRAS	G12D	SNV	36.2053	30666.6
					TP53	C242Y	SNV	30.8855	26160.6
P8	79	M	IV	Tail	KRAS	G12D	SNV	4.47559	59.7503
					TP53	G245S	SNV	3.2038	42.7641
P9	51	F	IV	Not applicable	KRAS	G12D	SNV	9.12191	1223.53
					TP53	L32Rfs*12	INDEL	8.42	1130
P12	77	M	IV	Tail	KRAS	G12D	SNV	1.64835	277.665
					TP53	D228Lfs*20	INDEL	1.51	254
P13	66	M	IV	Head	KRAS	G12D	SNV	9.03955	250.308
					TP53	S303Qfs*3	INDEL	7.48	207
P15	69	M	IV	Tail	SMAD4	W99C	SNV	9.76155	1004.17
					KRAS	G12V	SNV	7.16533	737.1
					TP53	H233Gfs*13	INDEL	3.01294	309.938
P16	72	M	IV	Tail	KRAS	G12R	SNV	10.6651	123.502
					TP53	Y234C	SNV	8.77193	101.576
P18	58	M	IV	Not applicable	KRAS	G12D	SNV	1.9	521
					TP53	R175H	SNV	1.79	492
P19	51	M	IV	Tail	TP53	A276D	SNV	19.0504	5015.02
					KRAS	G12D	SNV	13.0079	3424.32
					CDKN2A	N39Lfs*15	INDEL	5.26	1384
P22	58	F	IV	Head	KRAS	G12V	SNV	2.6087	13.8557
P23	57	M	IV	Not applicable	KRAS	G12D	SNV	11.9718	537.655
					TP53	E198*	SNV	9.94994	446.855
					ARID1A	R1461*	SNV	8.05369	361.691
P24	72	F	IV	Not applicable	TP53	R175H	SNV	1.66521	58.2038
					KRAS	G12D	SNV	1.49829	52.3672
P25	63	F	IV	Body	RNF43	A146D	SNV	1.3973	525.96
					KRAS	G12R	SNV	0.812156	305.701
					SMAD4	Splice Site	SNV	0.77	290
					TP53	R267G	SNV	0.68089	256.297
P26	77	M	III	Head	CDKN2A	R80*	SNV	8.33	62
					TP53	Splice Site	SNV	4.19	31
					KRAS	Q22K	SNV	3.51	26
P28	71	M	IV	Tail	TP53	Splice Site	SNV	1.94	62
					SMAD4	D355Y	SNV	1.78069	58.4985
					KRAS	G12V	SNV	1.44858	47.5856
P33	69	M	IV	Head	KRAS	G12V	SNV	75.6551	2367.25
P34	41	M	IV	Tail	KRAS	G12D	SNV	3.05556	15.0368
P36	49	F	III	Head	KRAS	G12R	SNV	2.70552	28.7305
					TP53	R196*	SNV	1.41732	15.0485
P37	81	F	IV	Head	TP53	R196*	SNV	51.2225	4917.36
					KRAS	G12D	SNV	30.8975	2966.16
P38	79	M	IV	Tail	KRAS	G12C	SNV	3.13268	920.256
					TP53	R267W	SNV	2.5722	755.609
					KRAS	G12V	SNV	0.728771	214.083
P40	54	M	IV	Head	KRAS	G12D	SNV	0.793126	30.9553
					TP53	V173M	SNV	0.540865	21.1054
P41	66	M	IV	Tail	TP53	S183*	SNV	1.97239	14.671
					CDKN2A	S43_Y44delinsN	INDEL	0.777202	5.78355
P43	62	M	IV	Body	KRAS	G12V	SNV	51.4627	12565.7
					TP53	R273H	SNV	35.2127	8597.89
P44	65	M	IV	Head	KRAS	G12V	SNV	0.227998	12.8044
P48	69	M	IV	Body	TP53	G266V	SNV	52.495	38582.3
					KRAS	G12D	SNV	33.8483	24877.5
P51	72	M	IV	Not applicable	KRAS	G12V	SNV	0.49	18
P56	50	M	IV	Not applicable	TP53	T211Nfs*5	INDEL	39.7	1210
					KRAS	G12D	SNV	37.5147	1143.45
P63	63	M	IV	Body	KRAS	G12D	SNV	10.762	647.333
					TP53	C28Y	SNV	7.6281	458.83
P74	78	M	IV	Tail	KRAS	G12D	SNV	48.8878	22603.7
					TP53	R175H	SNV	41.7544	19305.6
					RNF43	L87V	SNV	31.426	14530.1
P108	74	M	IV	Tail	KRAS	G12V	SNV	14.3852	152.77
					TP53	G245S	SNV	7.69231	81.6923
					CDKN2A	Y44*	INDEL	4.16	44
